# Supplementary material for: A distinct bacterial dysbiosis associated skin inflammation in ovine footrot
Source: PubMed Central journal article supplement (PMC5364556; doi:10.1038/srep45220), 2017-03-24
Supplement: srep45220-s1.pdf [file srep45220-s1.pdf]

# **A distinct bacterial dysbiosis associated skin inflammation in ovine footrot**

Grazieli Maboni<sup>a\*</sup>, Adam Blanchard<sup>a\*</sup>, Sara Frosth<sup>b,c</sup>, Ceri Stewart<sup>a</sup>, Richard Emes<sup>a,d</sup> and Sabine Töttemeyer<sup>a,e</sup>

<sup>a</sup> University of Nottingham, School of Veterinary Medicine and Science, Sutton Bonington, United Kingdom

<sup>b</sup> Department of Biomedical Sciences and Veterinary Public Health, Swedish University of Agricultural Sciences, Uppsala, Sweden

<sup>c</sup> Department of Microbiology, National Veterinary Institute (SVA), Uppsala, Sweden

<sup>d</sup> Advanced Data Analysis Centre (ADAC), University of Nottingham, United Kingdom

<sup>e</sup> Email for correspondence: [sabine.totemeyer@nottingham.ac.uk](mailto:sabine.totemeyer@nottingham.ac.uk)

\* Both authors contributed equally

**Supplementary Table 1. Standard curve data for RT-qPCR assays**

| <b>Gene</b>                  | <b>Cq values range</b> | <b>Slope</b> | <b>R<sup>2</sup></b> | <b>Efficiency</b> | <b>Melt curve peaks</b> |
|------------------------------|------------------------|--------------|----------------------|-------------------|-------------------------|
| <i>IL1<math>\beta</math></i> | 23-37                  | -3.482       | 0.963                | 93.7%             | Single                  |
| <i>IL6</i>                   | 26-38                  | -3.321       | 0.709                | 100%              | Single                  |
| <i>CXCL8</i>                 | 26-32                  | -3.489       | 0.998                | 93.5%             | Single                  |
| <i>IL17</i>                  | 25-34                  | -3.460       | 0.905                | 94.5%             | Single                  |
| <i>18S rRNA</i>              | 11 - 13                | -3.423       | 0.998                | 96%               | Single                  |
| <i>ACTB</i>                  | 22- 29                 | -3.563       | 0.997                | 91%               | Single                  |
| <i>TUBA</i>                  | 31 - 37                | -4.45        | 0.865                | 122%              | Single                  |
| <i>PPIA</i>                  | 23 - 49                | -3.586       | 0.961                | 90%               | Single                  |
| <i>GAPDH</i>                 | 20 - 34                | -3.464       | 0.870                | 94%               | Single                  |
| <i>TMEM79</i>                | 27 - 30                | -3.413       | 0.963                | 96%               | Single                  |
| <i>ASCC2</i>                 | 30 - 35                | -3.466       | 0.985                | 94%               | Single                  |
| <i>C3ORF58</i>               | 30 - 32                | -3.250       | 0.953                | 103%              | Single                  |
| <i>BHLHE40</i>               | 27 - 30                | -3.559       | 0.998                | 91%               | Single                  |
| <i>DDX54</i>                 | 29 - 32                | -3.410       | 0.997                | 96%               | Single                  |

*ACTB*:  $\beta$ -Actin; *PPIA*: cyclophilin; *18S rRNA*: eucariotic 18S ribosomal RNA; *TUBA*:  $\alpha$ -tubulin; *GAPDH*: Glyceraldehyde-3-Phosphate Dehydrogenase; *TMEM79*: Transmembrane protein 79; *ASCC2*: Activating signal cointegrator 1 complex subunit 2; *C3ORF58*: chromosome 3 open reading frame 58; *BHLHE40*: basic helix-loop-helix family, member e40; *DDX54*: DEAD (Asp-Glu-Ala-Asp) box polypeptide 54. Cq= quantification cycles.

**Supplementary Table 2. Gene expression stability analysis using RefFinder software.** Samples from all clinical conditions were included in this analysis (n=40). Low stability values= high gene expression stability.

| Genorm          |                 | NormFinder      |                 | Bestkeeper      |                 | Delta CT        |                 | Comprehensive analysis |                 |
|-----------------|-----------------|-----------------|-----------------|-----------------|-----------------|-----------------|-----------------|------------------------|-----------------|
| Gene            | Stability value | Gene            | Stability value | Gene            | Stability value | Gene            | Stability value | Gene                   | Stability value |
| <i>ACTB</i>     | 0.348           | <i>ACTB</i>     | 1.414           | <i>ACTB</i>     | 0.514           | <i>DDX54</i>    | 1.374           | <i>DDX54</i>           | 0.323           |
| <i>PPIA</i>     | 0.348           | <i>DDX54</i>    | 1.732           | <i>PPIA</i>     | 0.534           | <i>ACTB</i>     | 1.396           | <i>ACTB</i>            | 0.365           |
| <i>DDX54</i>    | 0.582           | <i>PPIA</i>     | 2.06            | <i>DDX54</i>    | 0.565           | <i>PPIA</i>     | 1.413           | <i>PPIA</i>            | 0.428           |
| <i>C3ORF58</i>  | 0.717           | <i>C3ORF58</i>  | 4.427           | <i>TMEM79</i>   | 0.706           | <i>C3ORF58</i>  | 1.488           | <i>C3ORF58</i>         | 0.56            |
| <i>ASCC2</i>    | 0.848           | <i>ASCC2</i>    | 5.623           | <i>18S rRNA</i> | 0.723           | <i>ASCC2</i>    | 1.627           | <i>ASCC2</i>           | 0.857           |
| <i>BHLHE40</i>  | 0.995           | <i>BHLHE40</i>  | 6.236           | <i>C3ORF58</i>  | 0.727           | <i>BHLHE40</i>  | 1.813           | <i>BHLHE40</i>         | 1.278           |
| <i>TUBA</i>     | 1.16            | <i>TMEM79</i>   | 7.348           | <i>BHLHE40</i>  | 0.76            | <i>TUBA</i>     | 1.993           | <i>TUBA</i>            | 1.499           |
| <i>GAPDH</i>    | 1.301           | <i>TUBA</i>     | 7.454           | <i>ASCC2</i>    | 0.91            | <i>GAPDH</i>    | 2.022           | <i>GAPDH</i>           | 1.518           |
| <i>TMEM79</i>   | 1.629           | <i>18S rRNA</i> | 8.409           | <i>TUBA</i>     | 0.967           | <i>TMEM79</i>   | 2.884           | <i>TMEM79</i>          | 2.621           |
| <i>18S rRNA</i> | 1.899           | <i>GAPDH</i>    | 8.459           | <i>GAPDH</i>    | 1.584           | <i>18S rRNA</i> | 2.978           | <i>18S rRNA</i>        | 2.712           |

*ACTB*:  $\beta$ -Actin; *PPIA*: cyclophilin; *18S rRNA*: eucariotic 18S ribosomal RNA; *TUBA*:  $\alpha$ -tubulin; *GAPDH*: Glyceraldehyde-3-Phosphate Dehydrogenase; *TMEM79*: Transmembrane protein 79; *ASCC2*: Activating signal cointegrator 1 complex subunit 2; *C3ORF58*: chromosome 3 open reading frame 58; *BHLHE40*: basic helix-loop-helix family, member e40; *DDX54*: DEAD (Asp-Glu-Ala-Asp) box polypeptide 54.

**Supplementary Table 3. RT-qPCR and PCR Primers**

| <b>Gene</b>      | <b>Strand</b>                    | <b>Sequence 5`-3`</b>                                       | <b>Accession</b> | <b>Reference</b>         |
|------------------|----------------------------------|-------------------------------------------------------------|------------------|--------------------------|
| <i>GAPDH*</i>    | Forward                          | CCACCAACTGCTTGGCCCCC                                        | AF022183.1       | (Davenport et al., 2014) |
|                  | Reverse                          | GGACACGTTGGGGGTGGGGA                                        |                  |                          |
| <i>B-Actin</i>   | Forward                          | TGTGCGTGACATCAAGGAGAA                                       | NM_001009784     | (Hughes et al., 2011)    |
|                  | Reverse                          | CGCAGTGGCCATCTCTCTG                                         |                  |                          |
| 18S rRNA         | Forward                          | GCAATTATCCCCATGAACG                                         | DQ013885         | (Taylor et al., 2008)    |
|                  | Reverse                          | CAAAGGGCAGGGACTTAATC                                        |                  |                          |
| 16S rRNA*        | Forward 341                      | TCGTCGGCAGCGTCAGATGTGTATAAGA<br>GACAGCCTACGGGNGGCWGCAG      |                  | (Klindworth et al 2013)  |
|                  | Reverse 534                      | GTCTCGTGGGCTCGGAGATGTGTATAAG<br>AGACAGGACTACHVGGGTATCTAATCC |                  |                          |
| <i>α-Tubulin</i> | Forward                          | CCAGATGGTGAATGTGACC                                         | AF251146         | (Taylor et al., 2008)    |
|                  | Reverse                          | GCATTGACATCTTTGGGAAC                                        |                  |                          |
| <i>PPIA</i>      | Forward                          | CATACAGGTCTGGCATCTTGTC                                      | AY251270         | (Lloyd et al., 2012)     |
|                  | Reverse                          | TGCCATCCAACCACTCAGTCT                                       |                  |                          |
| <i>GAPDH</i>     | Forward                          | TCCGTTGTGGATCTGACCTG                                        | AF030943         | (Hughes et al., 2011)    |
|                  | Reverse                          | TGCTTCACCACCTTCTTGATCTC                                     |                  |                          |
| <i>ASCC2</i>     | Forward                          | AGGAGGCTTGAAGACAGCAA                                        | XM_04017467      | This study               |
|                  | Reverse                          | GTTGTCACAGCTGCTTTCCA                                        |                  |                          |
| <i>BHLHLE40</i>  | Forward                          | CTACCAGGGATGGATTTTGC                                        | NM_001129741     | This study               |
|                  | Reverse                          | TCCGGTCACGTCTCTTTTTC                                        |                  |                          |
| <i>C3ORF58</i>   | Forward                          | TGGTGCTACAGATTTTCCAT                                        | XM_012130530     | This study               |
|                  | Reverse                          | GCGAGGTCAACTCGTTTCTC                                        |                  |                          |
| <i>DDX54</i>     | Forward                          | GAAGCTGGGACCTGGTAGAC                                        | XM_012098176     | This study               |
|                  | Reverse                          | GTTCTGAGCTCGCACCATCT                                        |                  |                          |
| <i>TMEM79</i>    | Forward                          | CATTGTAAGTGGGATCCTGGT                                       | XM_004002610     | This study               |
|                  | Reverse                          | ATGAAGAGCTGGACCGACTG                                        |                  |                          |
| IL1β             | Forward                          | TTCTGCATGAGCTTCGTACAA                                       | X56972.1         | (Darlay et al., 2011)    |
|                  | Reverse                          | GGGTCGGTGTATCACCTTTTT                                       |                  |                          |
| IL17             | Forward                          | GAGTCTGGTGGCTCTTGTA                                         | XM_004018887     | This study               |
|                  | Reverse                          | TGCTGTGGGAAGTTCTTGTC                                        |                  |                          |
| <i>CXCL8</i>     | Forward                          | GAGAAGTCTCTGGGACAGC                                         | NM_001009401     | This study               |
|                  | Reverse                          | CAGCCAGCTTGGAAAGTCATA                                       |                  |                          |
| IL6              | Forward                          | AATTTCTGCAGTTCAGCCT                                         | NM_001009392     | This study               |
|                  | Reverse                          | GTTTCTGACCAGAGGAGGGA                                        |                  |                          |
| <i>AprV2</i>     | <i>aprV2/B2F</i>                 | GAAGGCGACTGGTTTGATAACTG                                     | M35016           | (Frosth et al., 2015)    |
|                  | <i>aprV2/B2R</i>                 | GAGCTGTGCGTTCTTTCTTTGC                                      |                  |                          |
|                  | <i>aprV2probe<br/>FAM-MGBNFQ</i> | ATGCGGTGGTTATCCT                                            |                  |                          |

All primers were used for qPCR except \*Primers, which were used in the conventional PCR reaction for quality control of cDNA synthesis.

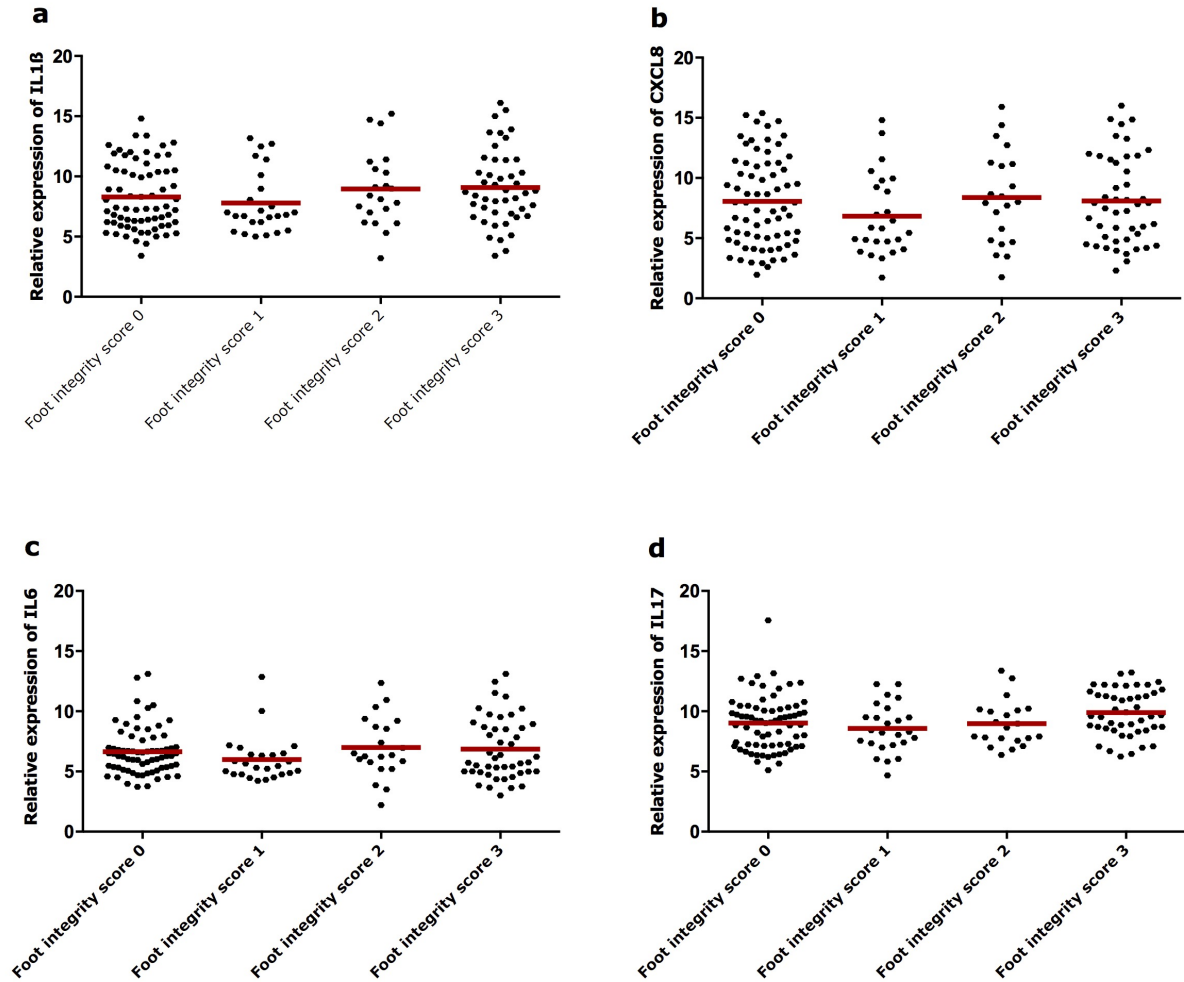

**Supplementary Figure 1. mRNA expression levels of proinflammatory cytokines across the different ovine foot conformation/integrity scores.** (a) IL1 $\beta$ , (b) CXCL8, (c) IL6 and (d) IL17. Ovine foot scoring system conformation of the sole and heel/wall of each digit: **0**= undamaged sole and heel area with a perfect shape. **1**= mildly damaged/misshapen sole and/or heel area of the digit (<25%). **2**= moderately damaged/misshapen sole and/or heel area of the digit (>25% and <75%). **3**= severely damaged/misshapen sole and/or heel area of the digit (>75%). Mean is represented by red bars. Data were analysed by Dunn's multiple comparisons test.

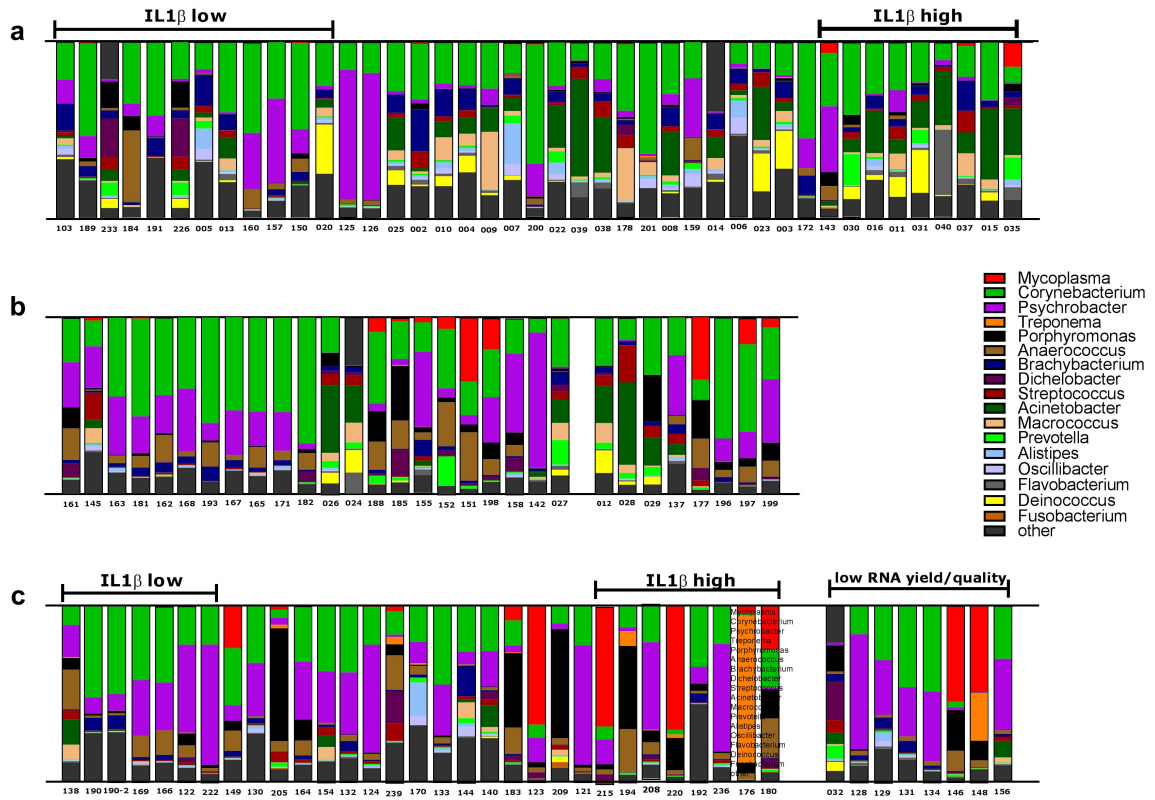

**Supplementary Figure 2. Composition of individual bacterial communities.** (a) Visibly healthy feet; (b) feet with interdigital dermatitis; (c) feet with footrot. Associated qPCR quantified levels of IL1 $\beta$  and samples with poor RNA yield or quality are highlighted to show samples reused in further analysis and omitted due to lack of sample for qPCR analysis.

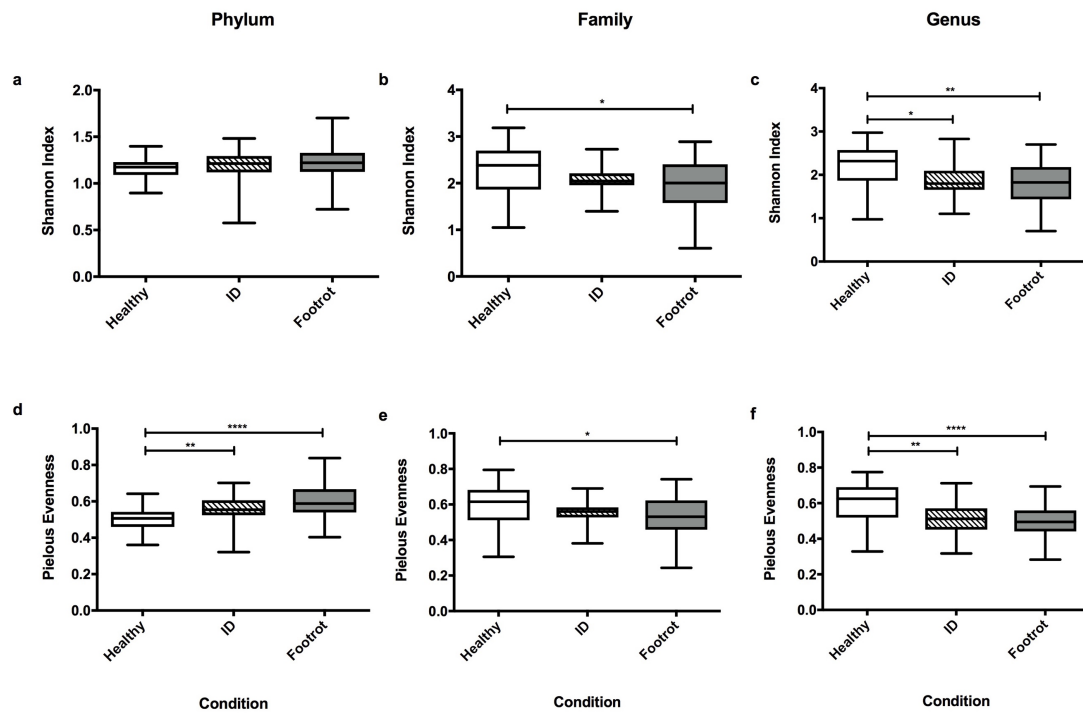

**Supplementary Figure 3. Differences between diversity indices associated with disease state.**

Indices were calculated for each sample according to disease state and analysed for significant differences using Kruskal-Wallis test (Dunn`s multiple comparison test, non-parametric). **a,b,c** show Shannon diversity indices, **d,e,f** show Pielous evenness indices for each taxonomic level. Sample numbers are Healthy n=40, ID n=30 and Footrot n=36. P-values are displayed as \* p = ≤ 0.05, \*\* p = ≤ 0.01, \*\*\*p = ≤ 0.001, \*\*\*\*p = ≤ 0.0001.

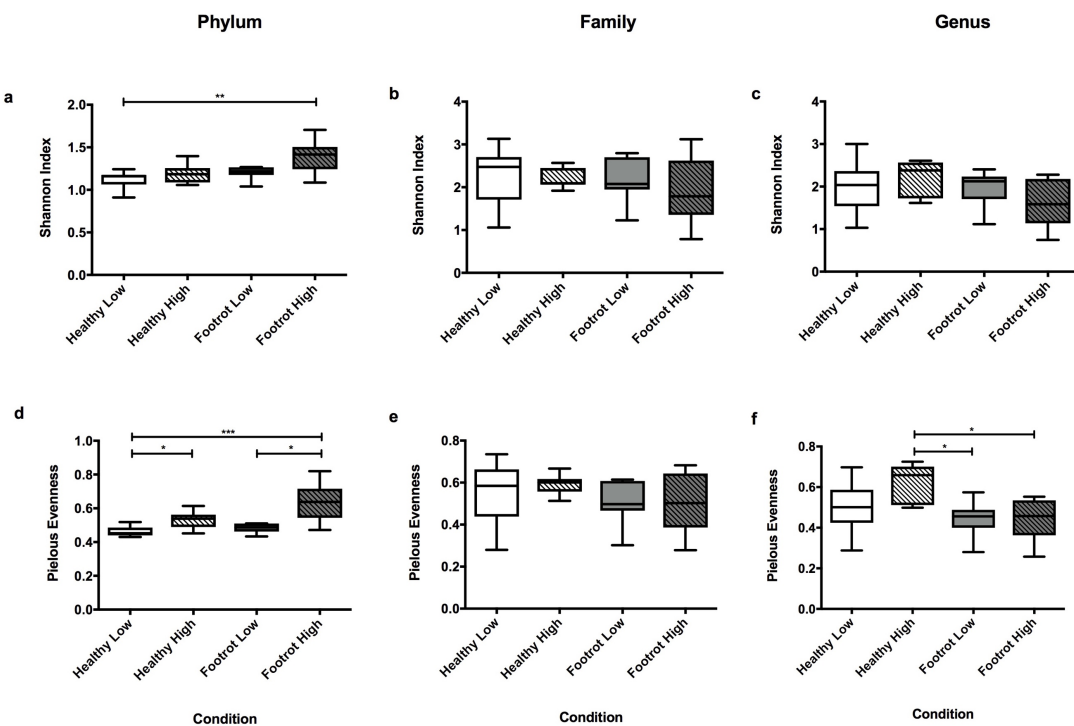

**Supplementary Figure 4. Differences in diversity indices associated with inflammation and disease state.**

Indices were calculated for each sample according to disease state and analysed for significant differences using Kruskal-Wallis test (Dunn`s multiple comparison test, non-parametric). **a,b,c** show Shannon diversity indices, **d,e,f** show Pielous evenness indices for each taxonomic level. Sample numbers are healthy low n=12, healthy high n=9, footrot low n=7 and footrot high n=8. P-values are displayed as \* p = ≤ 0.05, \*\* p = ≤ 0.01, \*\*\*p = ≤ 0.001, \*\*\*\*p = ≤ 0.0001.
